# Supplementary material for: Sphingosine kinase 1 promotes tumor immune evasion by regulating the MTA3-PD-L1 axis
Source: Cell Mol Immunol. 2022 Sep 1;19(10):1153–67. doi: 10.1038/s41423-022-00911-z (PMC9508236; doi:10.1038/s41423-022-00911-z)
Supplement: Supplementary file 1 — Supplementary Information [file 41423_2022_911_MOESM1_ESM.pdf]

# Supplementary Information

**a**

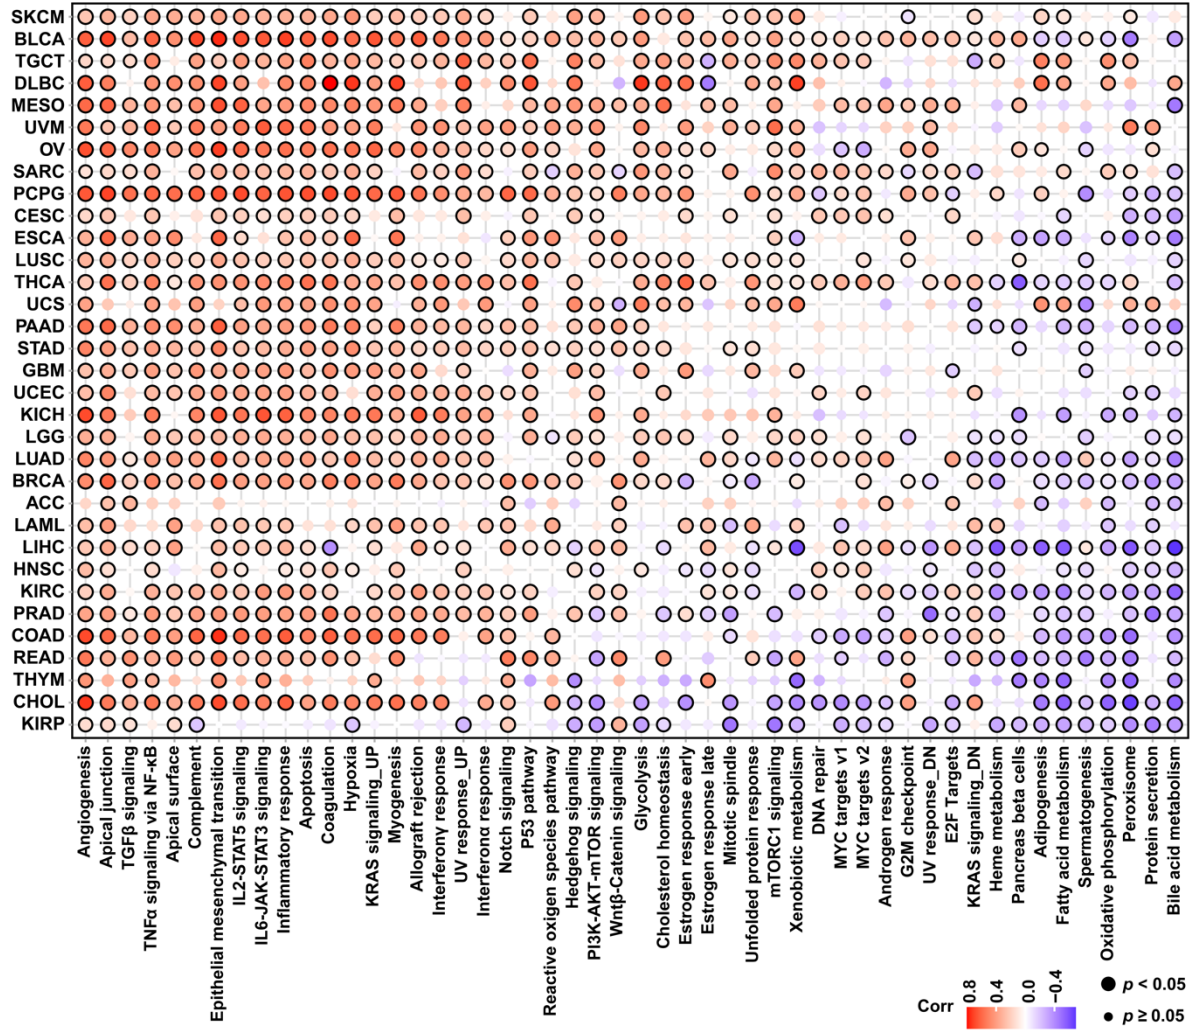

**b**

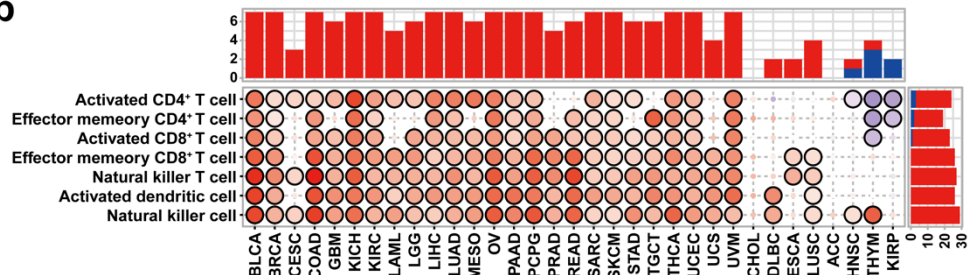

**c**

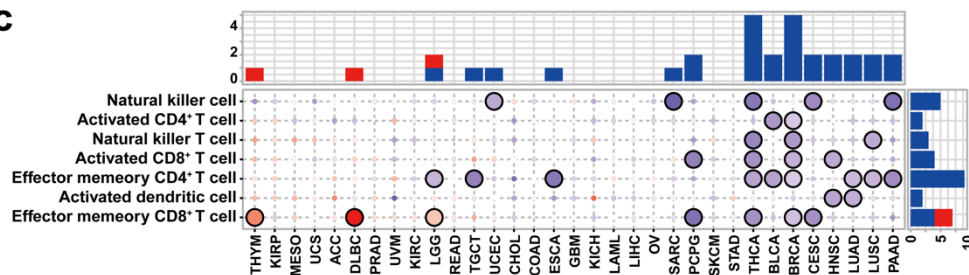

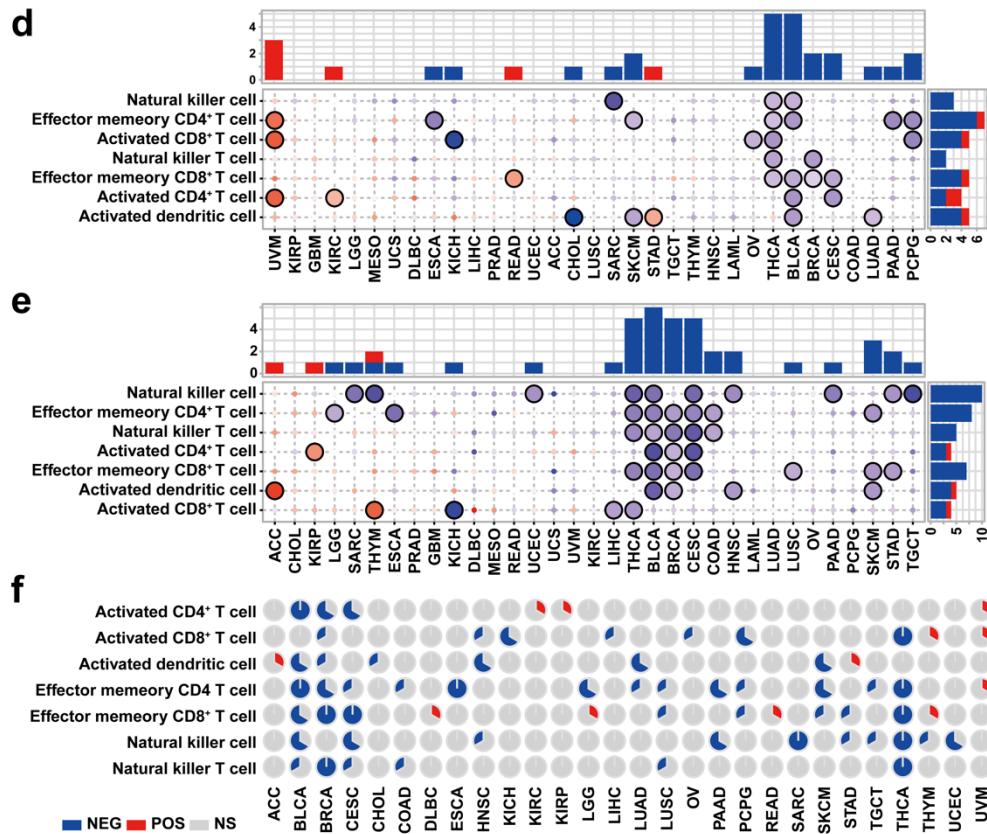

**Supplementary Fig. 1, related to Fig. 1.**

**a**, Spearman's correlation between SPHK1 expression and MSigDB hallmark pathways across 33 cancer types. **b**, Spearman's correlation between SPHK1 expression and anti-tumor immune cells. **c-f**, Spearman's correlation between SPHK1 expression and ratio of anti-tumor and suppressive immune cells (**c-e**), and the fraction of significant correlation (**f**). Color of dots represent the correlation. Blackmark represents the significance (Spearman's correlation test,  $p < 0.05$ ). Color of bar plots and pie charts represent the count and fraction of significant correlation. Blue represents a significantly negative correlation (NEG), red represents a significantly positive correlation (POS), and grey represents non-significant correlation (NS).

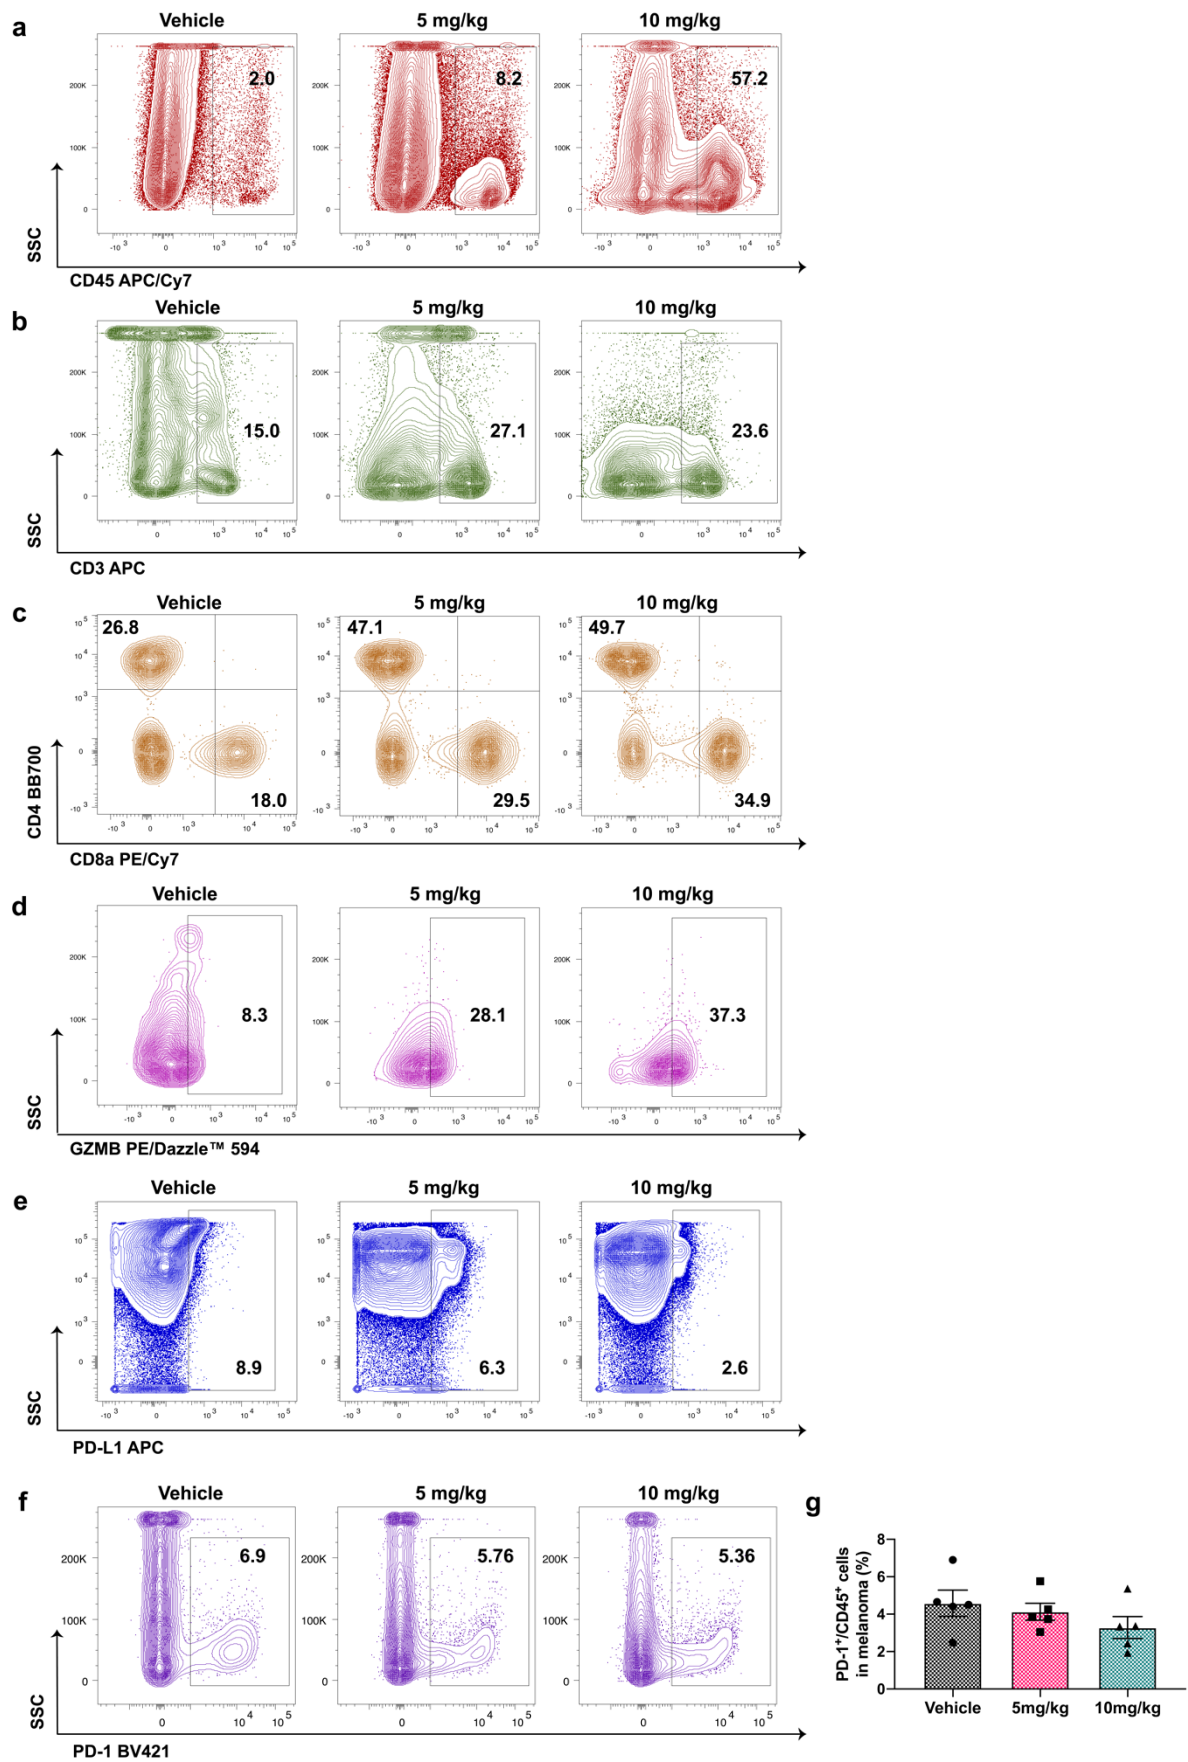

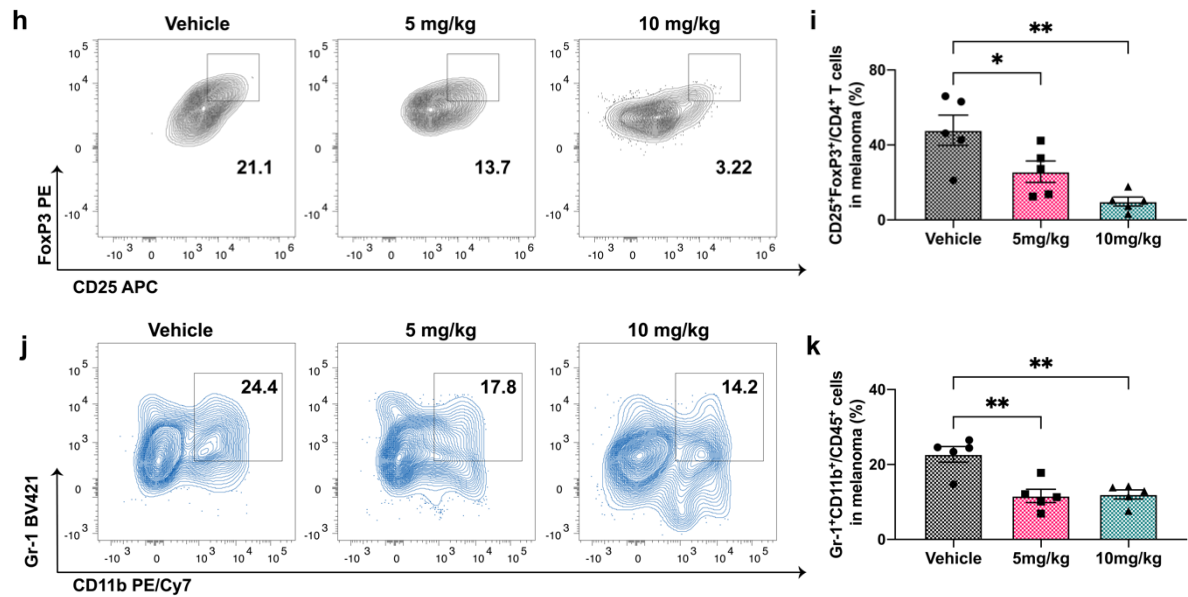

**Supplementary Fig. 2, related to Fig. 2.**

**a-e**, Representative profiles of fluorescence-activated cell sorting of CD45<sup>+</sup> cells (**a**), CD3<sup>+</sup> in CD45<sup>+</sup> cells (**b**), CD4<sup>+</sup> or CD8<sup>+</sup> in CD3<sup>+</sup> cells (**c**), GZMB<sup>+</sup>CD8<sup>+</sup> TILs (**d**), and PD-L1 on CD45<sup>+</sup> cells (**e**) from B16F10. **f-g**, Fluorescence-activated cell sorting (FACS) of PD-1<sup>+</sup>CD45<sup>+</sup> cells from B16F10 plots (**f**) and quantification (**g**). **h-i**, FACS analysis of CD25<sup>+</sup>FoxP3<sup>+</sup> in CD4<sup>+</sup> T cells plots (**h**) and quantification (**i**). **j-k**, FACS analysis of Gr-1<sup>+</sup>CD11b<sup>+</sup> in CD45<sup>+</sup> cells plots (**j**) and quantification (**k**). Data represent mean  $\pm$  SEM. ns, non-significant,  $p > 0.05$ ,  $*p < 0.05$ ,  $**p < 0.01$ , and  $***p < 0.001$ , as determined by one-way ANOVA and Tukey's multiple comparisons test (**g**, **i**, **k**).

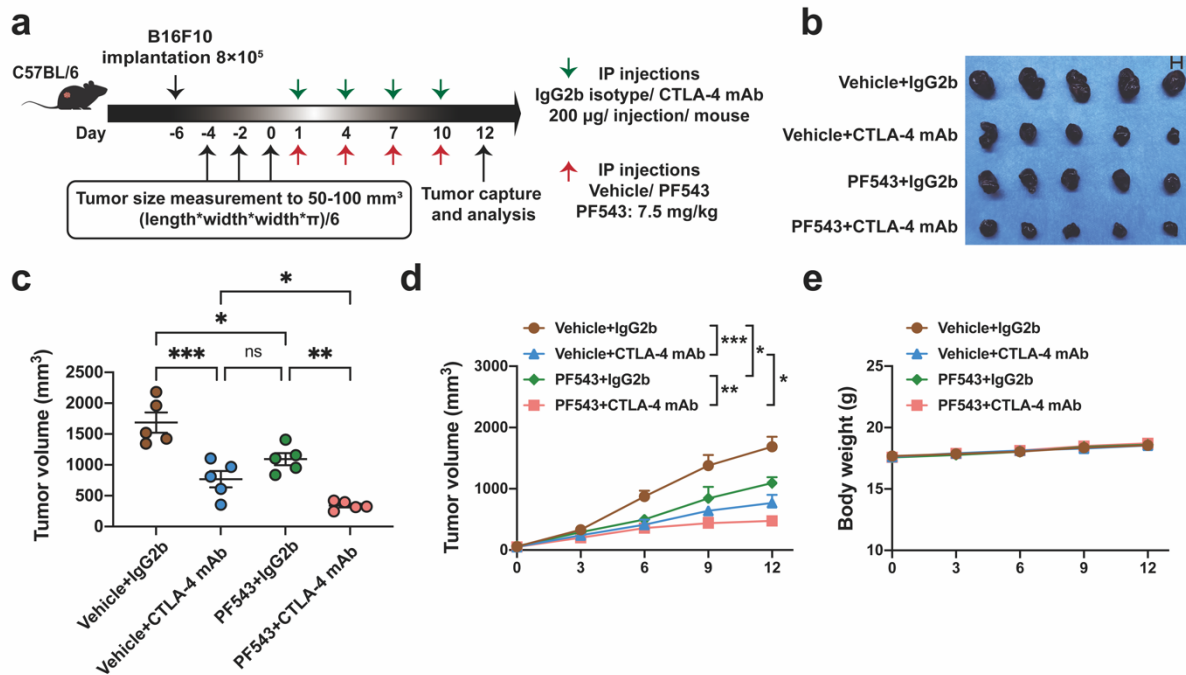

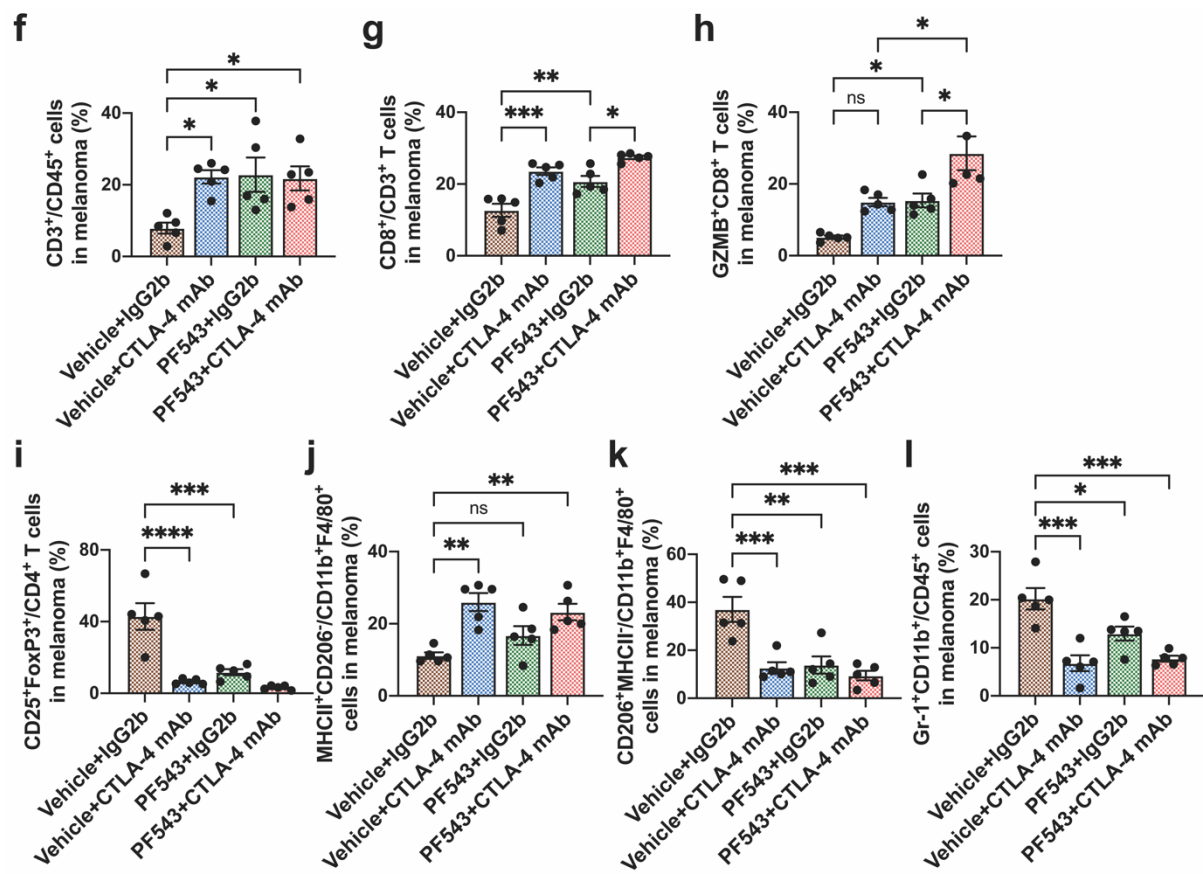

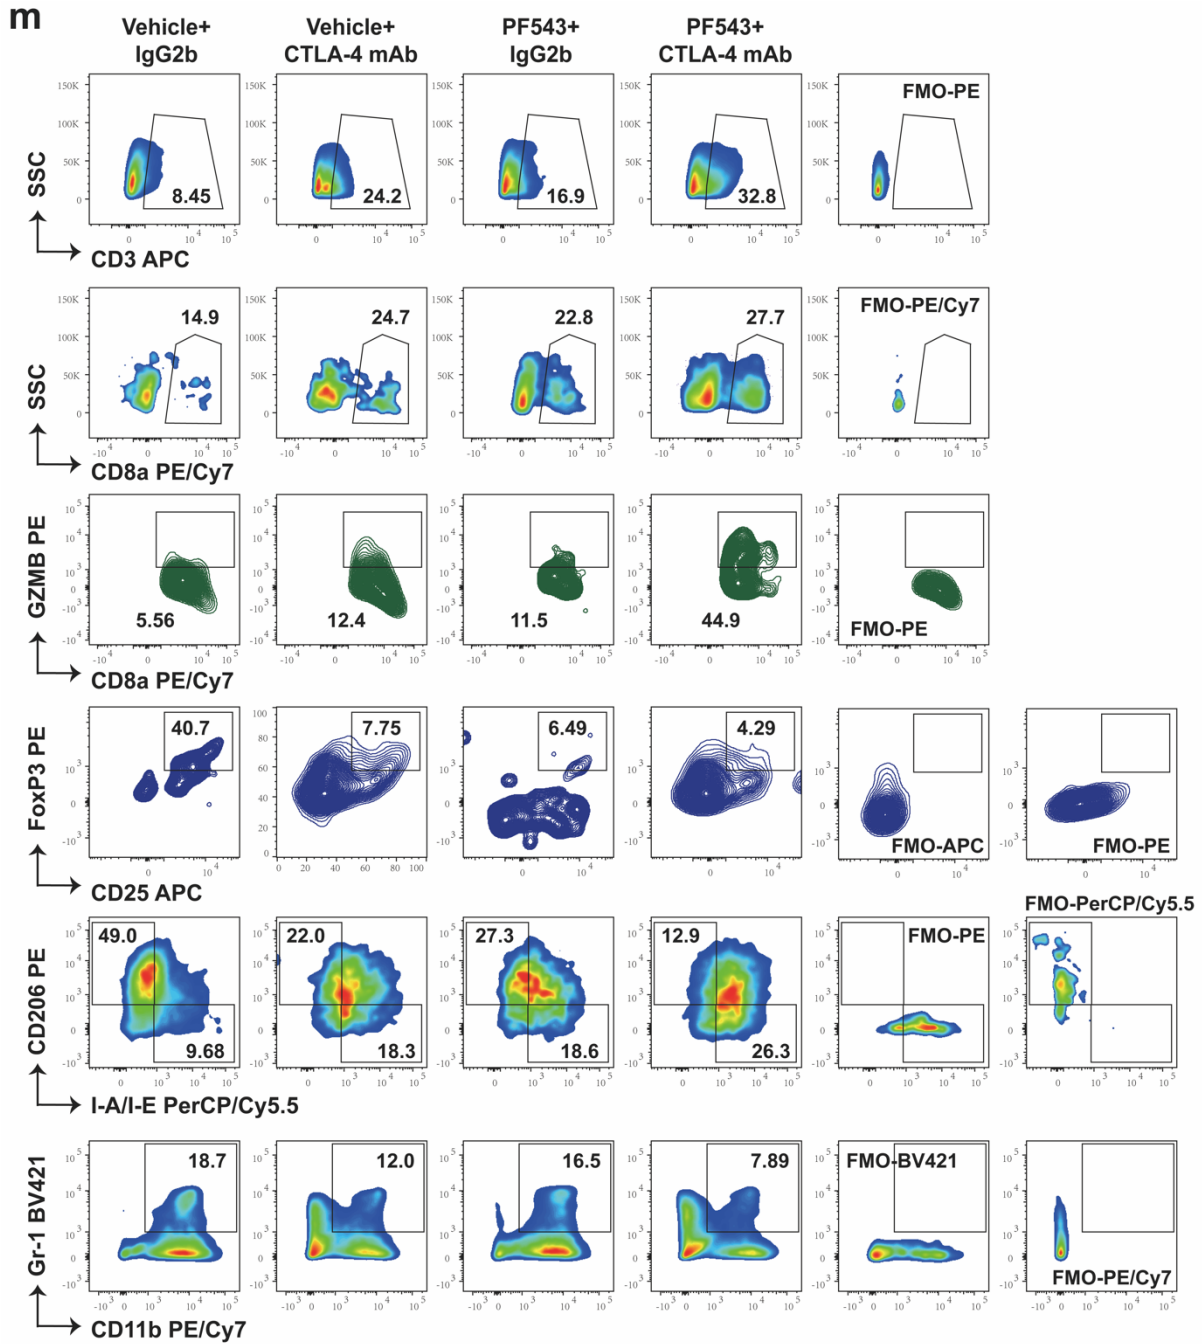

**Supplementary Fig. 3 The combination of PF543 and CTLA-4 mAb effectively suppresses melanoma tumor growth *in vivo*.**

**a**, Schematic diagram illustrating the treatment protocol of CTLA-4 mAb or/ and PF543 in B16F10 cells constructed mice model. At the endpoint, tumor cells were isolated for analysis. **b**, Image of B16F10 tumors, as captured on the twelfth day. **c**, Summary tumor volume data harvested on the twelfth day. See also Supplementary Tables 3-4. **d-e**, B16F10 tumor volume (**d**) and body weight (**e**) were measured at the indicated time points. **f-m**, FACS quantification of CD3<sup>+</sup> in CD45<sup>+</sup> cells (**f**), CD8<sup>+</sup> (**g**), GZMB<sup>+</sup>CD8<sup>+</sup> (**h**) in CD3<sup>+</sup> cells, CD25<sup>+</sup>FoxP3<sup>+</sup> in CD4<sup>+</sup> T cells (**i**), MHC class II<sup>+</sup>CD206<sup>-</sup> in CD11b<sup>+</sup>F4/80<sup>+</sup> cells (**j**), CD206<sup>+</sup>MHC class II<sup>-</sup> in CD11b<sup>+</sup>F4/80<sup>+</sup> cells (**k**), Gr-1<sup>+</sup>CD11b<sup>+</sup> in CD45<sup>+</sup> cells (**l**) and plots (**m**). 5 mice per cohort. Data represent mean  $\pm$  SEM. ns, non-significant,  $p > 0.05$ , \* $p < 0.05$ , \*\* $p < 0.01$ , and \*\*\* $p < 0.001$ , as determined by one-way ANOVA and Tukey's multiple comparisons test (**c**, **f-l**).

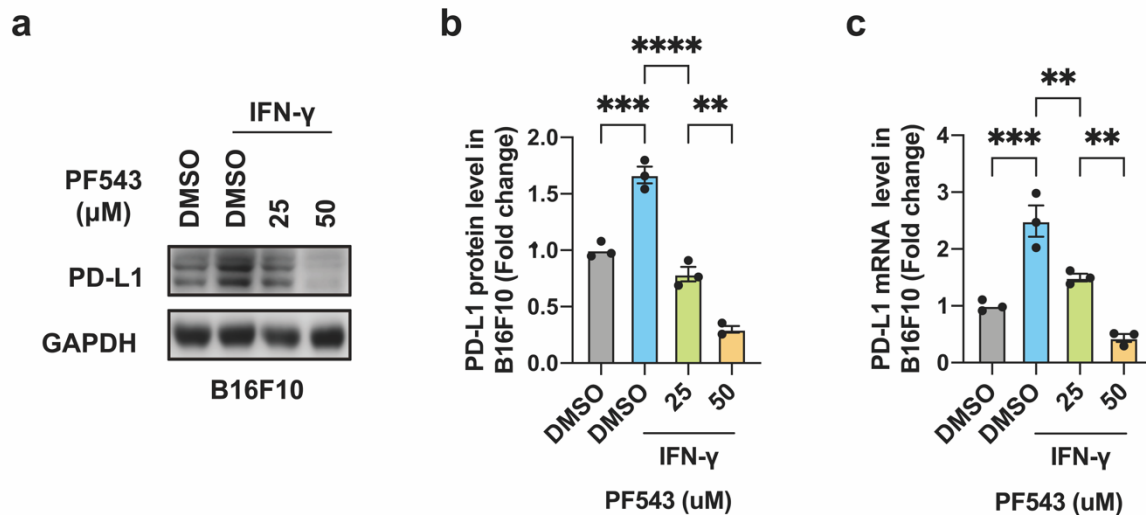

**Supplementary Fig. 4 PF543 treatment associates with decrease of tumor PD-L1 in B16F10 *in vitro*.**

**a**, Representative Western blot analysis of B16F10 cell line treated with increasing concentrations of PF543 (25 μM, 50 μM) for 24 hours under IFN-γ exposure. **b**, Bar graph presenting the quantitative analysis of PD-L1 protein expression data from (a). **c**, Bar diagram presentation of PD-L1 mRNA levels as determined by qRT-PCR of increasing concentrations of PF543 treatment for 24 hours under IFN-γ exposure (n = 3). The plot (b) was generated from three independent experiments and showed as mean ± SEM. ns, non-significant,  $p > 0.05$ ,  $*p < 0.05$ ,  $**p < 0.01$ ,  $***p < 0.001$ , and  $****p < 0.0001$ , as determined by one-way ANOVA and Tukey's multiple comparisons test (b, c).

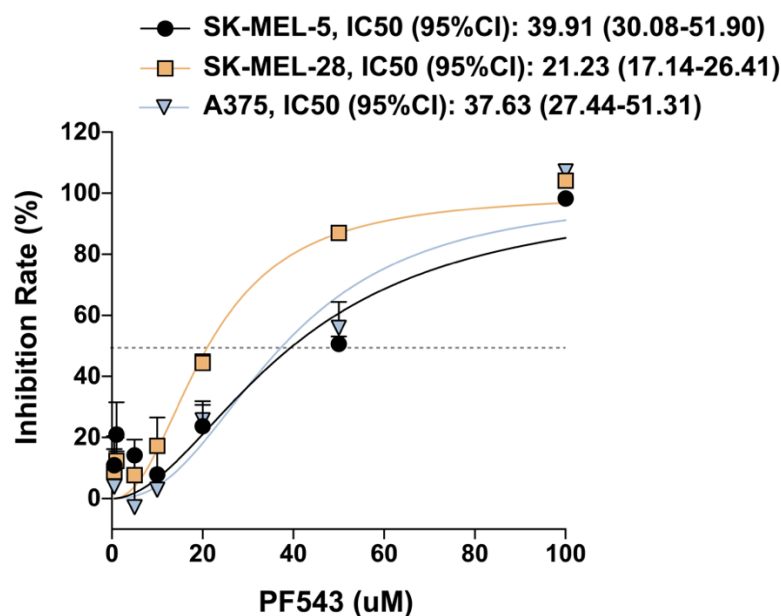

**Supplementary Fig. 5 Dose-response to PF543 in melanoma cell lines.**

SK-MEL-5, SK-MEL-28, and A375 melanoma cells were treated with DMSO or different concentrations of PF543 for 24 hours. Data represent mean ± SEM. IC50, half maximal

inhibitory concentration.

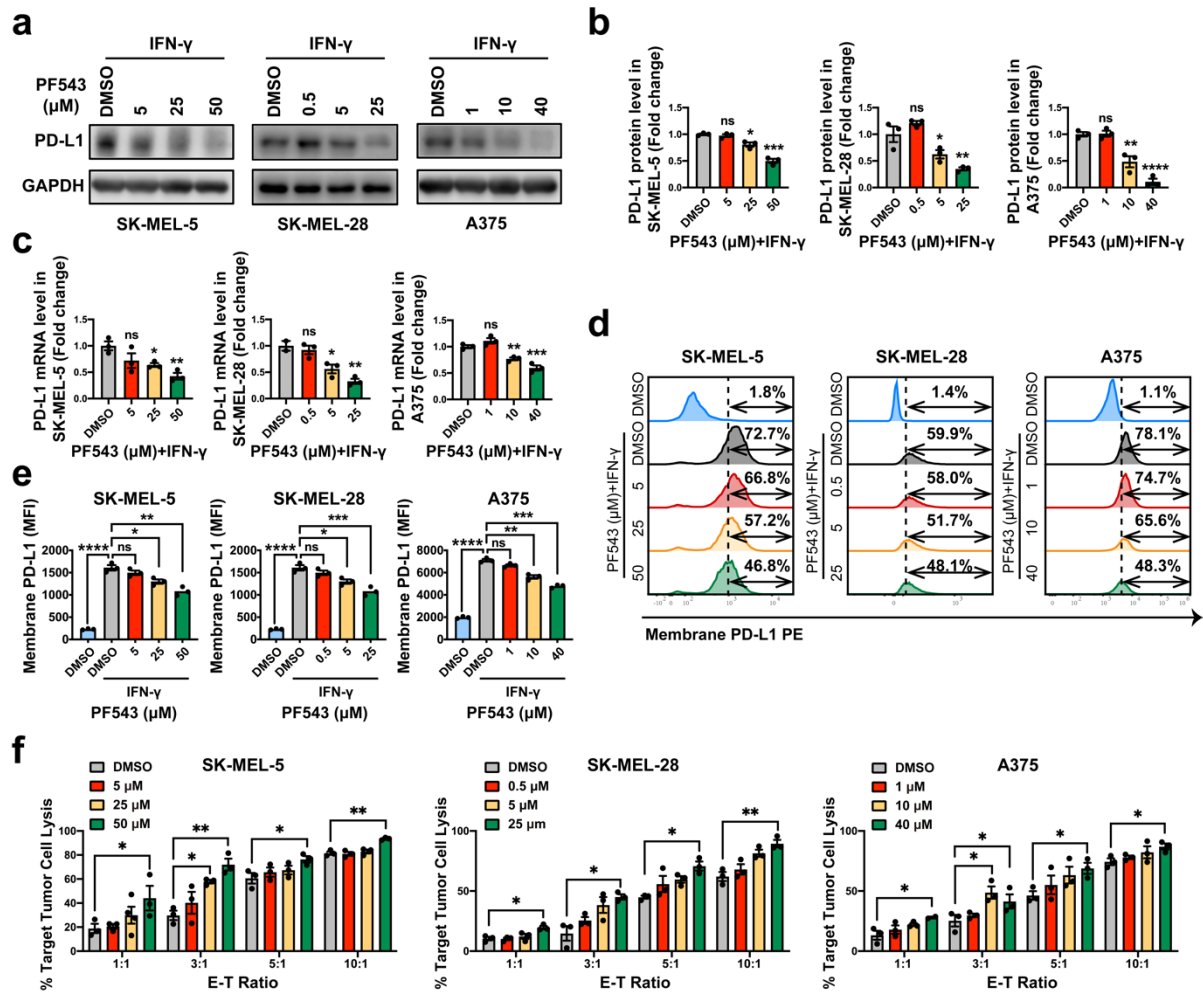

**Supplementary Fig. 6 SPHK1 inhibitor PF543 leads to the suppression of tumor growth and correlates with the expression of tumor PD-L1 *in vitro*.**

**a-c**, PD-L1 expression in SK-MEL-5, SK-MEL-28, and A375 cells treated with PF543 (concentrations based on dose-response analysis, [see also Supplementary Fig. 5](#)) and IFN- $\gamma$  (200 ng/mL) for 24 hours was analyzed by western blot (**a**) and quantification (**b**), or by RT-PCR (**c**;  $n = 3$ ). The plot (**b**) was generated from three independent experiments and showed as mean  $\pm$  SEM. ns, non-significant,  $p > 0.05$ , \* $p < 0.05$ , \*\* $p < 0.01$ , \*\*\* $p < 0.001$ , and \*\*\*\* $p < 0.0001$ , as determined by Dunnett's multiple comparisons test (**b**, **c**, **e**) and two-way ANOVA (**f**).

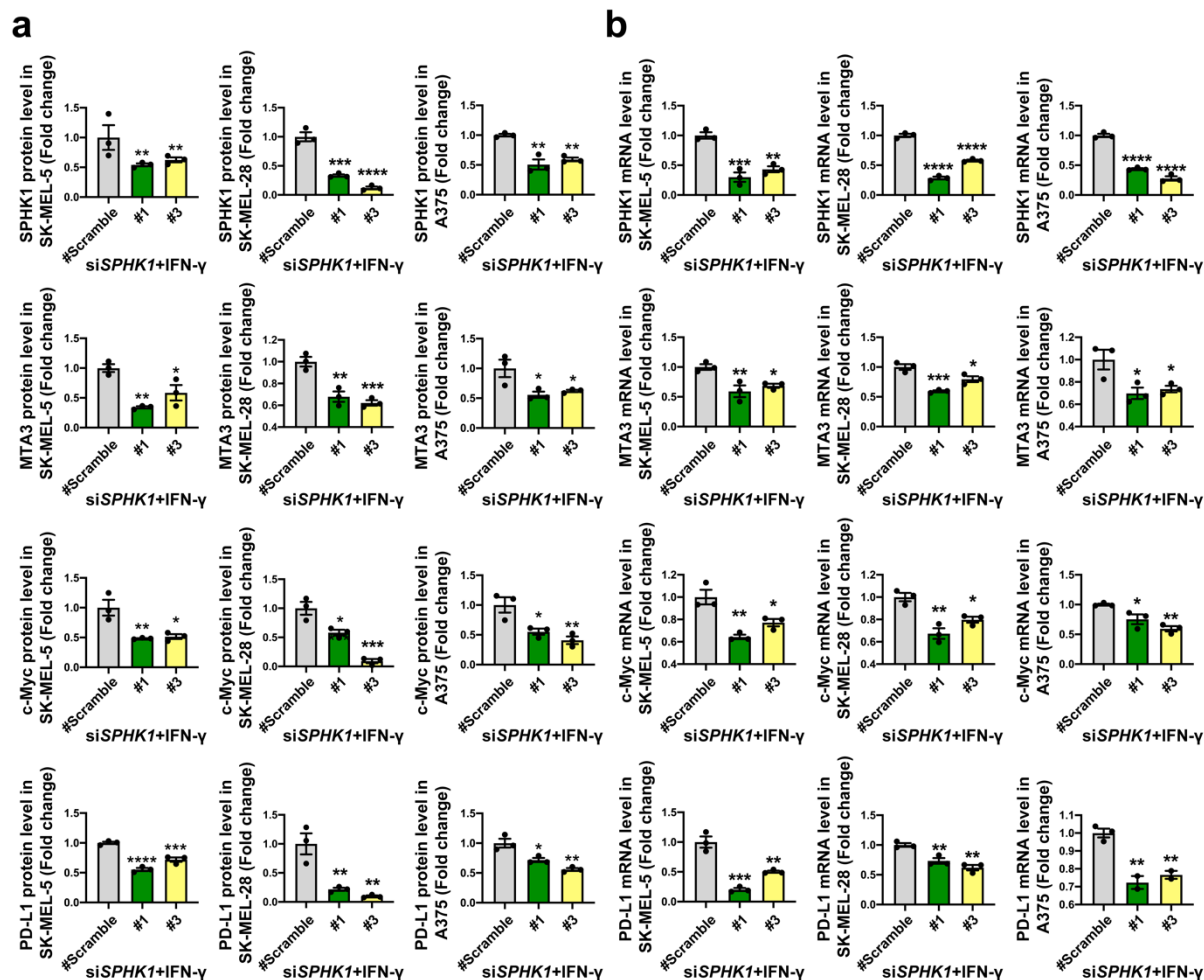

**Supplementary Fig. 7, related to Fig. 4.**

**a-b,** SK-MEL-5, SK-MEL-28, and A375 melanoma cells were transfected with siSPHK1 or scrambled negative control siRNA. SPHK1, MTA3, c-Myc, or PD-L1 expression was analyzed by western blot (**a**) and RT-PCR (**b**;  $n = 3$ ). The plot (**a**) was generated from three independent experiments and showed as mean  $\pm$  SEM. ns, non-significant,  $p > 0.05$ ,  $*p < 0.05$ ,  $**p < 0.01$ ,  $***p < 0.001$ , and  $****p < 0.0001$ , as determined by Dunnett's multiple comparisons test.

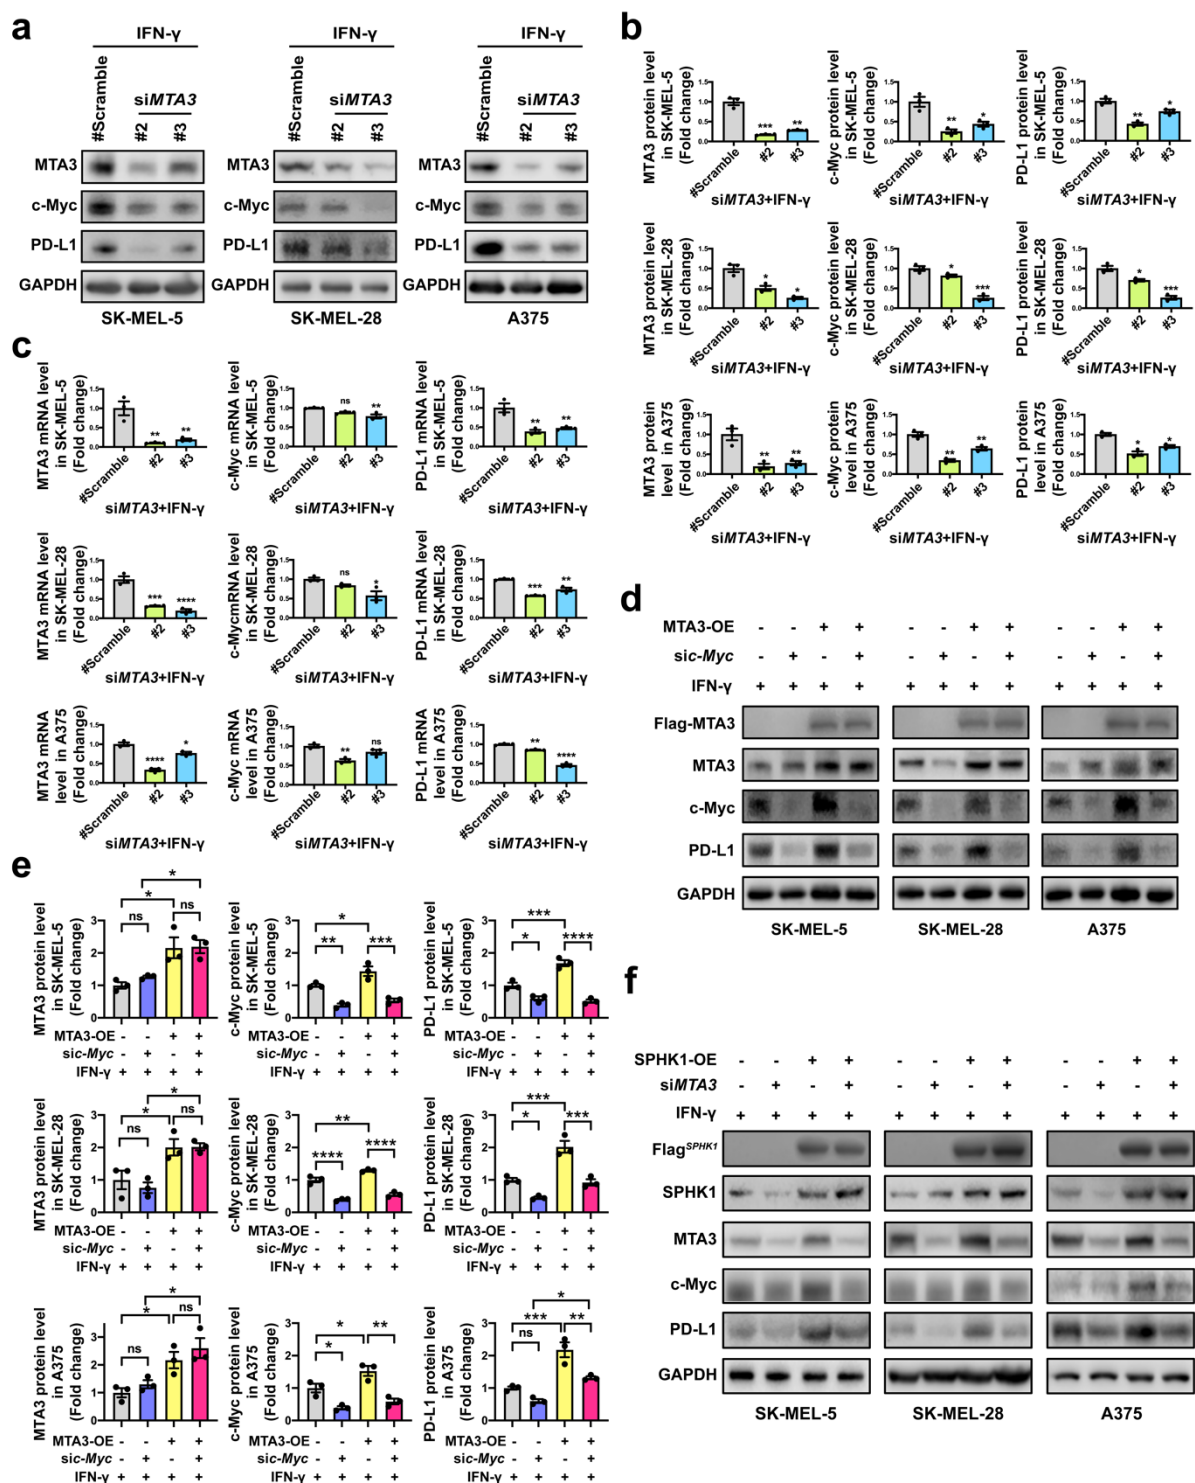

**Supplementary Fig. 8 SPHK1-MTA3 axis regulated PD-L1 expression levels *in vitro*.**

**a-c**, Melanoma cells were transfected with siMTA3 or scrambled negative control siRNA. MTA3, c-Myc, or PD-L1 expression were visualized and analyzed by western blot (**a**) and quantification (**b**), or by RT-PCR (**c**;  $n = 3$ ). The plot (**b**) was generated from three independent experiments and showed as mean  $\pm$  SEM. **d-e**, SK-MEL-5, SK-MEL-28, and A375 cells overexpressing MTA3 were transfected with sic-Myc or scrambled negative control siRNA. MTA3, c-Myc, or PD-L1 expression was visualized by western blot (**d**) and quantification (**e**). The plot (**e**) was generated from three independent experiments and showed as mean  $\pm$  SEM. **f**, Melanoma cells overexpressing SPHK1 were transfected with siMTA3 or scrambled negative

control siRNA, SPHK1, MTA3, c-Myc, or PD-L1 expression was analyzed by western blot. Data represent mean  $\pm$  SEM. ns, non-significant,  $p > 0.05$ ,  $*p < 0.05$ ,  $**p < 0.01$ ,  $***p < 0.001$ , and  $****p < 0.001$ , as determined by Dunnett's multiple comparisons test (**b, c**) and Tukey's multiple comparisons test (**e**).

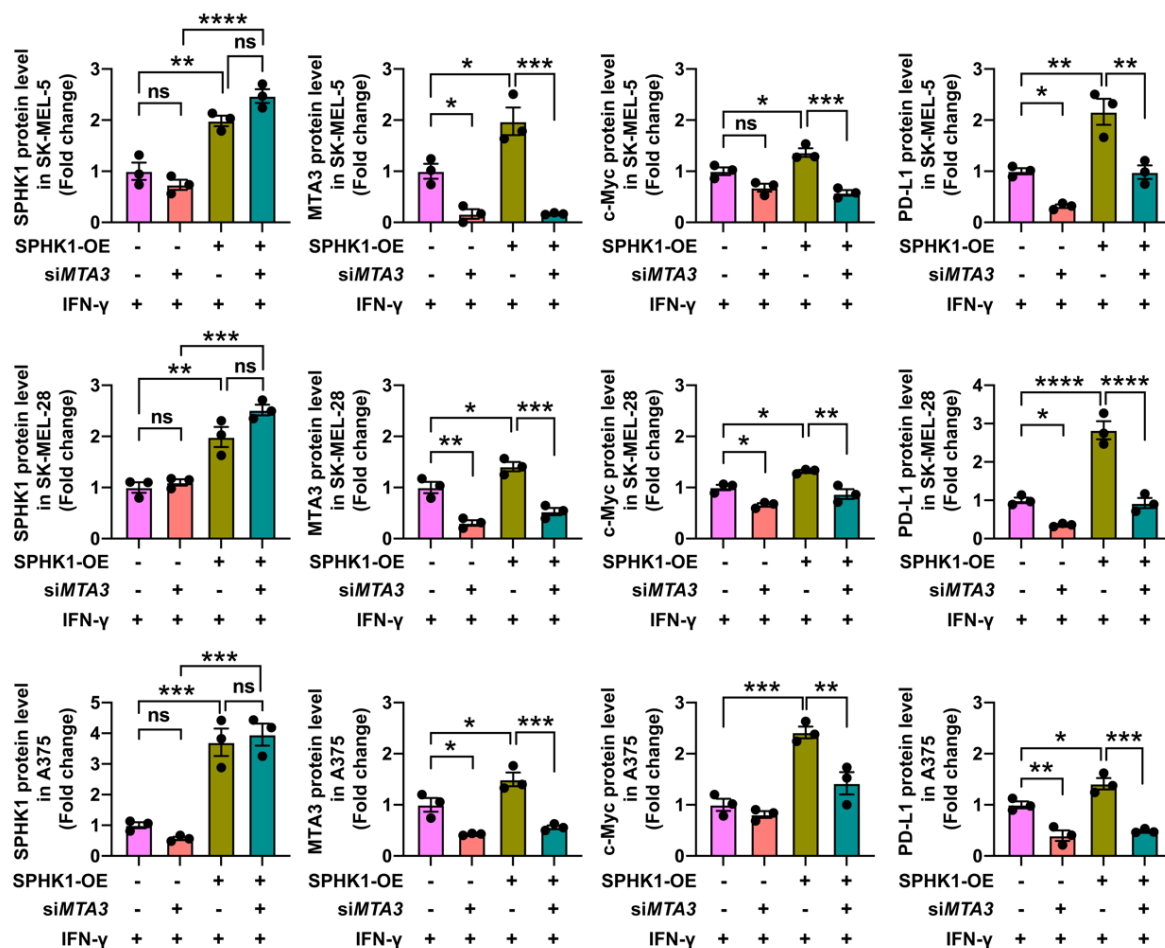

**Supplementary Fig. 9, related to Fig. 4.**

SK-MEL-5, SK-MEL-28, and A375 cells overexpressing SPHK1 were transfected with siMTA3 or scrambled negative control siRNA. SPHK1, MTA3, c-Myc, or PD-L1 protein levels were analyzed based on western blot. The plot was generated from three independent experiments and showed as mean  $\pm$  SEM. ns, non-significant,  $p > 0.05$ ,  $*p < 0.05$ ,  $**p < 0.01$ ,  $***p < 0.001$ , and  $****p < 0.001$ , as determined by Tukey's multiple comparisons test.

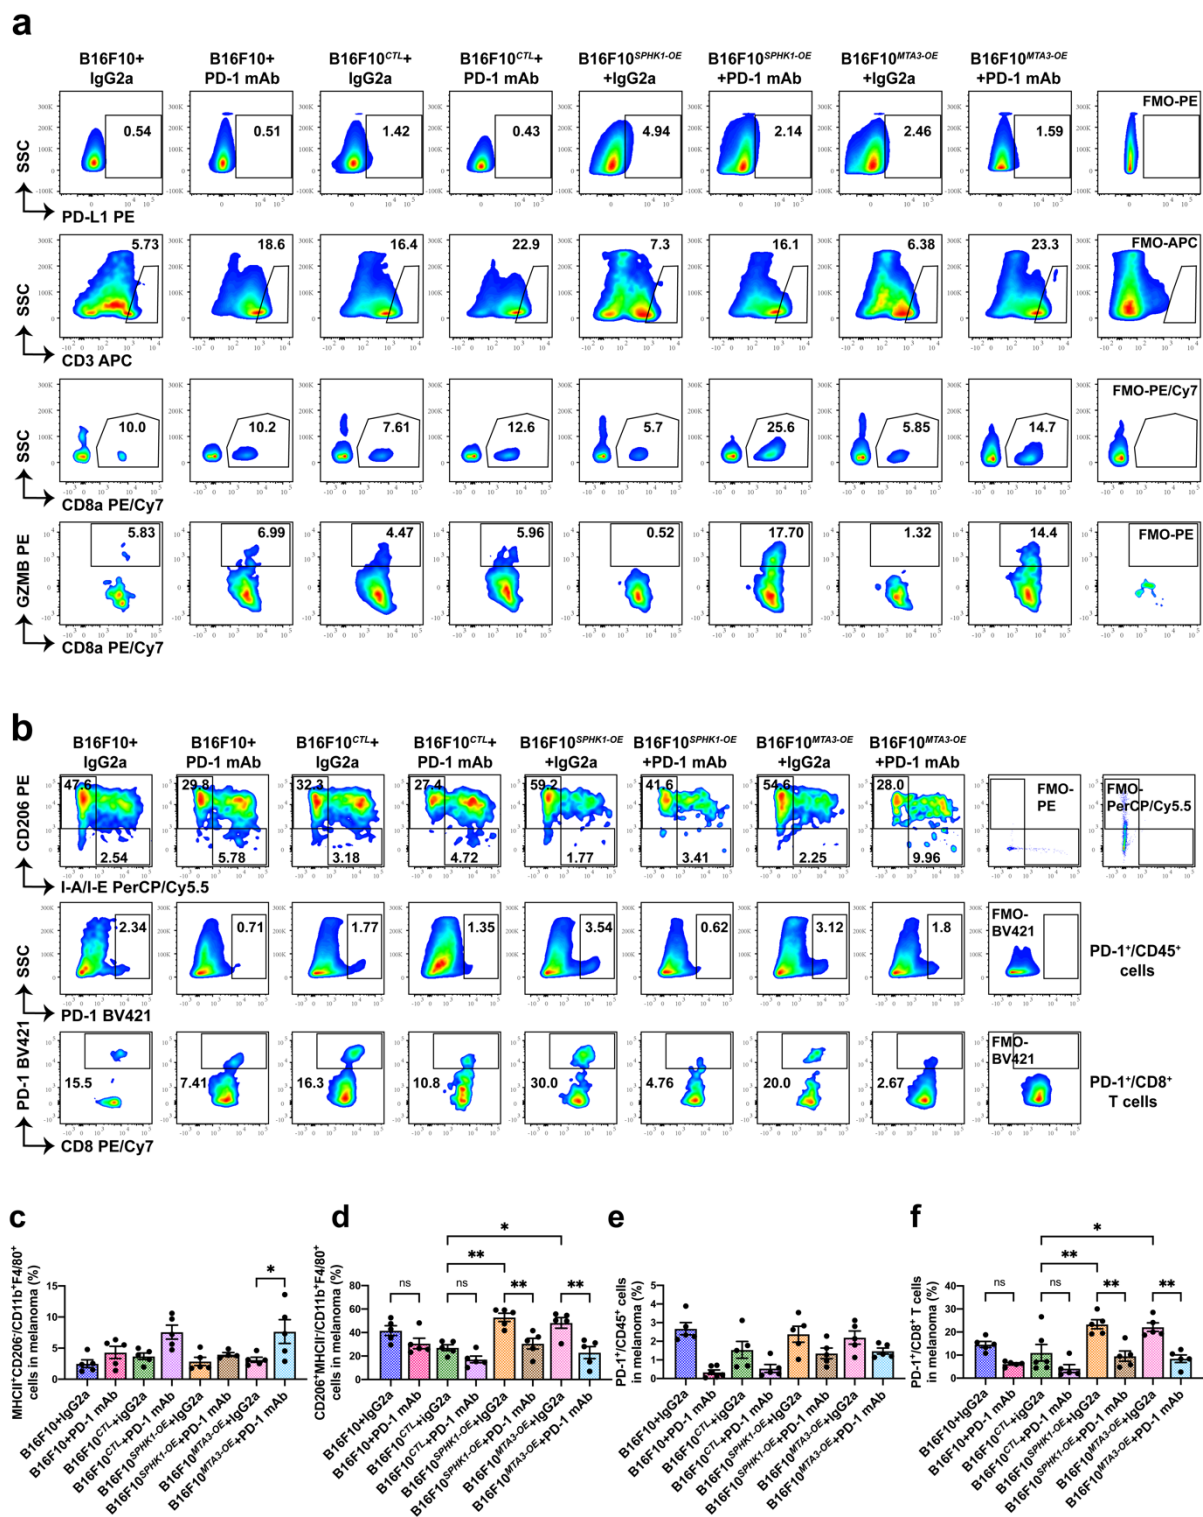

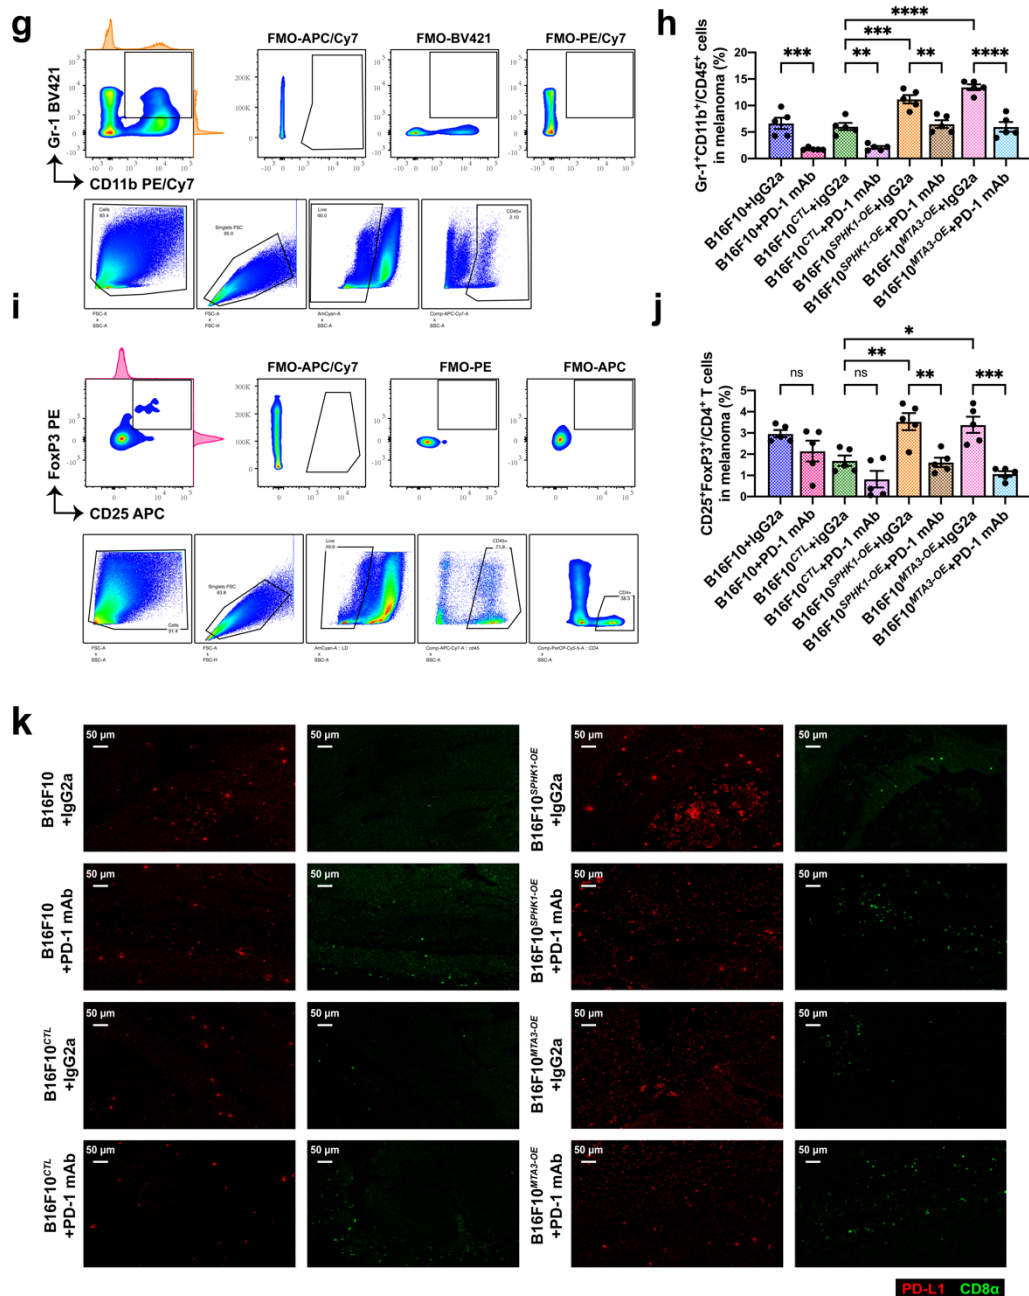

**Supplementary Fig. 10, related to Fig. 5.**

**a**, Representative profiles of fluorescence-activated cell sorting of PD-L1 on CD45<sup>+</sup> subsets, CD3<sup>+</sup> in CD45<sup>+</sup> cells, CD8<sup>+</sup> in CD3<sup>+</sup> cells, and GZMB<sup>+</sup>CD8<sup>+</sup> TILs from B16F10. **b-f**, Representative profiles and quantification of fluorescence-activated cell sorting of CD206<sup>+</sup>MHC class II<sup>+</sup> (c) or CD206<sup>+</sup>MHC class II<sup>-</sup> (d) in CD11b<sup>+</sup>Gr-1<sup>+</sup> cells, PD-1 on CD45<sup>+</sup> cells (e), and PD-1<sup>+</sup>CD8<sup>+</sup> cells (f) from B16F10. **g-j**, Gating strategies and quantification of fluorescence-activated cell sorting of Gr-1<sup>+</sup>CD11b<sup>+</sup> in CD45<sup>+</sup> cells (g, h) and CD25<sup>+</sup>FoxP3<sup>+</sup> in CD4<sup>+</sup> cells (i, j) from B16F10. **k**, Representative images displaying the individual markers from Fig. 5j. 5 mice per cohort. Data represent mean ± SEM. ns, non-significant,  $p > 0.05$ , \* $p < 0.05$ , \*\* $p < 0.01$ , \*\*\* $p < 0.001$ , and \*\*\*\* $p < 0.0001$ , as determined by one-way ANOVA and Tukey's multiple comparisons test (c-f, h, j).

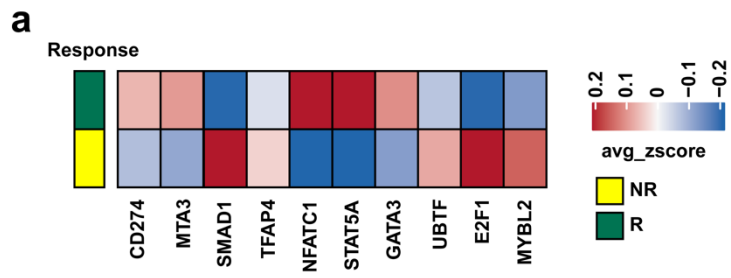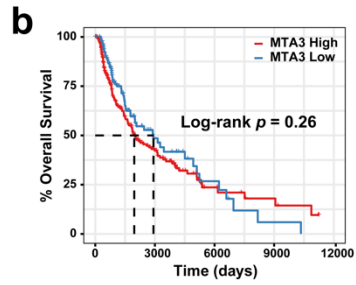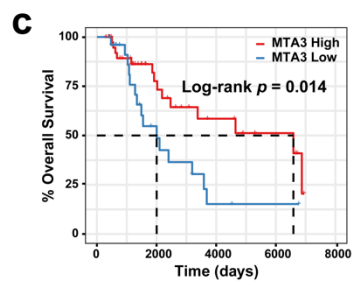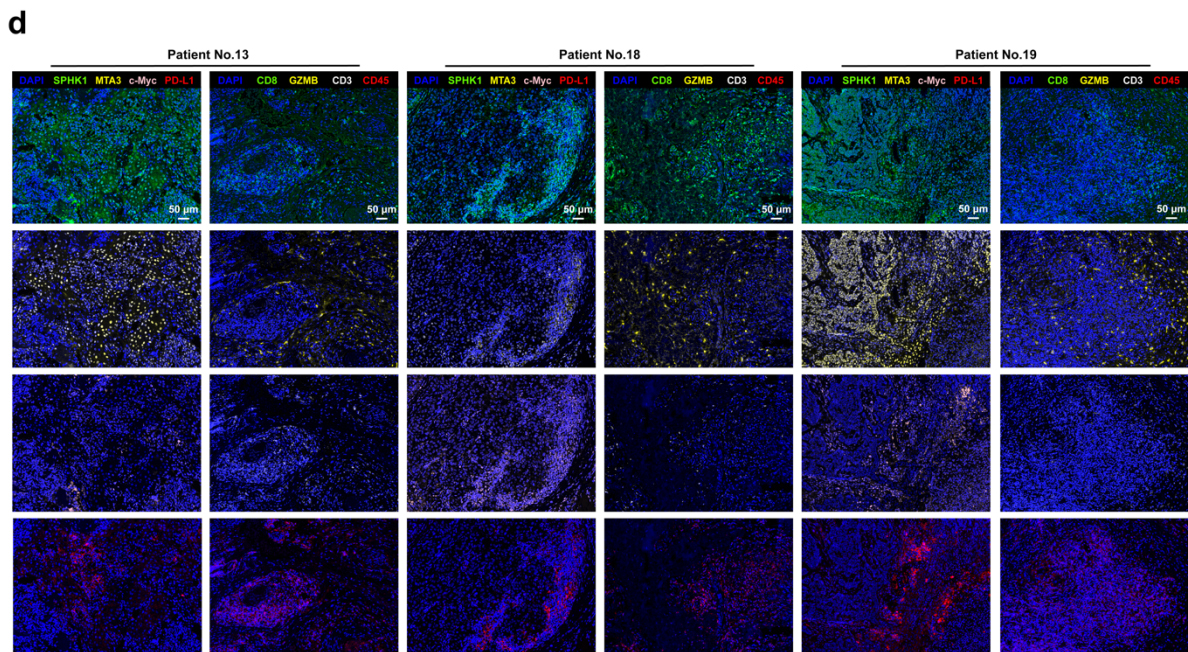

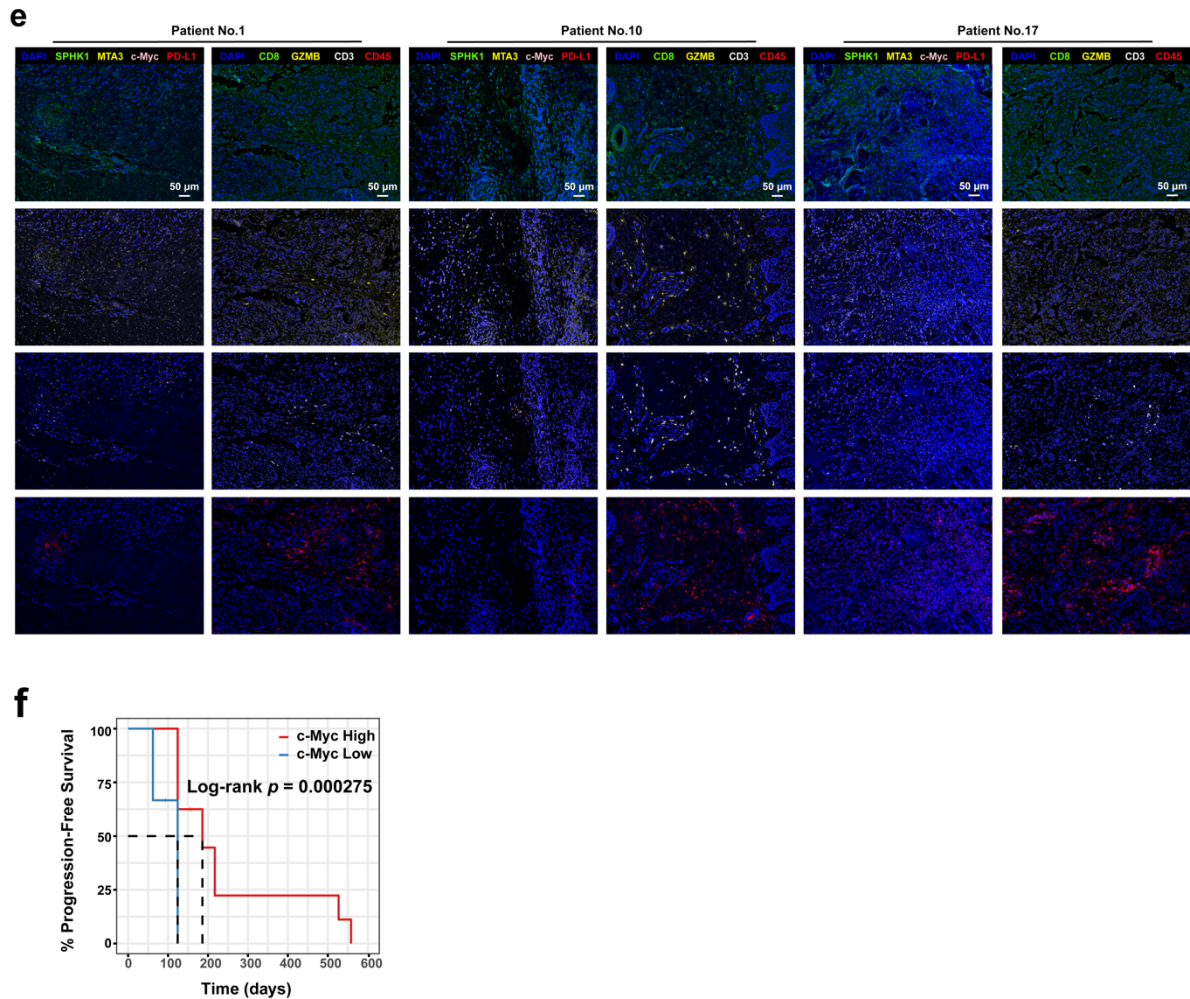

**Supplementary Fig. 11, related to Figure 6.**

**a**, Heat map showing the differential gene expression by calculating average z-scores in a total of 28 melanoma patients respond (R,  $n = 14$ ) or nonrespond (NR,  $n = 12$ ) to anti-PD-1 therapies. NA, not available ( $n = 2$ ). **b-c**, Kaplan–Meier estimates for overall survival of SKCM patients from TCGA database. Patients were subdivided according to the treatment (**b**) without or (**c**) with immunotherapies and stratified into two groups: low MTA3 expression (bottom 35%) and high MTA3 expression (the other). Significance was determined by the Log-rank test. **d-e**, Representative images displaying the individual markers together with the DAPI nuclear marker from No.13, No.18, No.19 cases (**d**) and No.1, No.10, No.17 cases (**e**). **f**, Kaplan–Meier survival curves of melanoma patients’ progression-free survival. Patients were stratified into two groups by median expression of c-Myc. Significance was determined by the Log-rank test.

**Supplementary Table 1, related to Fig.2** Summary of the pairwise comparison *p* values at each time point.

|                                     | Days   |        |        |        |        |
|-------------------------------------|--------|--------|--------|--------|--------|
|                                     | 0      | 2      | 4      | 6      | 8      |
| PF543 (5 mg/kg) vs Vehicle          | 0.9065 | 0.6168 | 0.0516 | 0.0051 | 0.0071 |
| PF543 (10 mg/kg) vs Vehicle         | 0.9299 | 0.4507 | 0.0091 | 0.0007 | 0.0001 |
| PF543 (10 mg/kg) vs PF543 (5 mg/kg) | 0.7209 | 0.9584 | 0.7446 | 0.3253 | 0.0050 |

**Supplementary Table 2, related to Fig.2** Summary of a mixed-effect model fitting. The tumor volume data were Log<sub>2</sub>-transformed before fitting. The vehicle was set as the reference group. The significant interaction effects between days and treatments suggest that the treatment functions as a higher anti-tumor efficacy as time goes versus the vehicle group.

|                        | Estimates | SEM  | <i>P</i>              |
|------------------------|-----------|------|-----------------------|
| Days                   | 0.49      | 0.19 | 0.014                 |
| Body weight            | -0.19     | 0.26 | 0.48                  |
| PF543 (5 mg/kg)        | 0.27      | 0.19 | 0.163                 |
| PF543 (10 mg/kg)       | 0.02      | 0.13 | 0.87                  |
| Days: PF543 (5 mg/kg)  | 1.20      | 0.19 | 2.90×10 <sup>-7</sup> |
| Days: PF543 (10 mg/kg) | 0.43      | 0.17 | 0.019                 |

**Supplementary Table 3, related to Supplementary Fig. 3** Summary of the pairwise comparison *p* values at each time point.

|  | Days |   |   |   |    |
|--|------|---|---|---|----|
|  | 0    | 3 | 6 | 9 | 12 |

|                                        |         |        |        |        |         |
|----------------------------------------|---------|--------|--------|--------|---------|
| Vehicle+CTLA-4 mAb vs Vehicle+IgG2b    | 0.9587  | 0.9061 | 0.0165 | 0.0105 | 0.0002  |
| PF543+IgG2b vs Vehicle+IgG2b           | 0.8686  | 0.4527 | 0.0029 | 0.0606 | 0.0117  |
| PF543+CTLA-4 mAb vs Vehicle+IgG2b      | 0.9947  | 0.1181 | 0.0017 | 0.0003 | <0.0001 |
| PF543+CTLA-4 mAb vs Vehicle+CTLA-4 mAb | 0.8730  | 0.3878 | 0.7127 | 0.4453 | 0.0152  |
| PF543+CTLA-4 mAb vs PF543+IgG2b        | >0.9999 | 0.9193 | 0.9749 | 0.0824 | 0.0017  |

**Supplementary Table 4, related to Supplementary Fig. 3** Summary of a mixed-effect model fitting. The tumor volume data were Log<sub>2</sub>-transformed before fitting. The PF543+CTLA-4 mAb was set as the reference group.

|                          | Estimates | SEM   | <i>P</i> |
|--------------------------|-----------|-------|----------|
| Days                     | 0.701     | 0.348 | 0.024    |
| Body weight              | 0.902     | 0.610 | 0.150    |
| Vehicle+IgG2b            | 0.675     | 0.664 | 0.319    |
| PF543+IgG2b              | 0.329     | 0.644 | 0.960    |
| Vehicle+CTLA-4 mAb       | -0.838    | 0.577 | 0.157    |
| Days: Vehicle+IgG2b      | -0.084    | 0.071 | 0.245    |
| Days: PF543+IgG2b        | -0.016    | 0.069 | -0.822   |
| Days: Vehicle+CTLA-4 mAb | 0.146     | 0.067 | 0.038    |

**Supplementary Table 5, related to Fig.3.**

Table summary of differentially expressed genes based on RNA sequencing analyses.

| <i>Symbol</i> | Log(FC) | Log(CPM) | LR     | FDR                    | <i>P</i>               |
|---------------|---------|----------|--------|------------------------|------------------------|
| <i>MYBL2</i>  | -0.80   | 7.07     | 260.49 | $9.70 \times 10^{-57}$ | $1.34 \times 10^{-58}$ |
| <i>E2F1</i>   | -0.77   | 4.72     | 138.33 | $1.91 \times 10^{-30}$ | $6.17 \times 10^{-32}$ |

|               |              |             |              |                                         |                                         |
|---------------|--------------|-------------|--------------|-----------------------------------------|-----------------------------------------|
| <b>UBTF</b>   | -0.51        | 6.69        | 135.44       | $7.98 \times 10^{-30}$                  | $2.64 \times 10^{-31}$                  |
| <b>GATA3</b>  | -0.50        | 2.74        | 20.22        | $2.89 \times 10^{-5}$                   | $6.91 \times 10^{-6}$                   |
| <b>STAT5A</b> | -0.37        | 4.68        | 35.18        | $2.00 \times 10^{-8}$                   | $3.01 \times 10^{-9}$                   |
| <b>NFATC1</b> | -0.31        | 3.39        | 9.85         | $4.58 \times 10^{-3}$                   | $1.70 \times 10^{-3}$                   |
| <b>MTA3</b>   | <b>-0.30</b> | <b>4.58</b> | <b>17.23</b> | <b><math>1.24 \times 10^{-4}</math></b> | <b><math>3.30 \times 10^{-5}</math></b> |
| <b>SMAD1</b>  | -0.28        | 3.36        | 8.59         | $8.52 \times 10^{-3}$                   | $3.38 \times 10^{-3}$                   |

FC=fold change, CPM=count-per-million, LR=likelihood ratio, FDR=false discovery rate.

#### Supplementary Table 6, related to Fig.4.

Correlation analyses among PD-L1, c-Myc, SPHK1 and MTA3 expression levels in melanoma patients. Samples were divided into two groups based on the median gene expression. For all of the expected values in cells that were greater than 5,  $p$  values were computed using Chi-square tests. Statistical significance was considered with  $p < 0.05$ .

|                                           |      | MTA3 |     |                                         | c-Myc |     |    |                                           |      | MTA3 |     |    |
|-------------------------------------------|------|------|-----|-----------------------------------------|-------|-----|----|-------------------------------------------|------|------|-----|----|
|                                           |      | High | Low | N                                       | High  | Low | N  |                                           |      | High | Low | N  |
| SPHK1                                     | High | 33   | 12  | 45                                      | 28    | 17  | 45 | PD-L1                                     | High | 35   | 10  | 45 |
|                                           | Low  | 12   | 33  | 45                                      | 17    | 28  | 45 |                                           | Low  | 10   | 35  | 45 |
|                                           | N    | 45   | 45  | 90                                      | 45    | 45  | 90 |                                           | N    | 45   | 45  | 90 |
| Pearson $\chi^2$ =19.600,<br>$p < 0.0001$ |      |      |     | Pearson $\chi^2$ =5.378,<br>$p = 0.020$ |       |     |    | Pearson $\chi^2$ =27.778,<br>$p < 0.0001$ |      |      |     |    |

#### Supplementary Table 7, related to Fig.5 Summary of the pairwise comparison $p$ values at each time point.

|                                        | Days   |        |         |        |        |        |
|----------------------------------------|--------|--------|---------|--------|--------|--------|
|                                        | 0      | 2      | 5       | 8      | 11     | 13     |
| <b>B16F10+PD-1 mAb vs B16F10+IgG2a</b> | 0.8526 | 0.9844 | >0.9999 | 0.9860 | 0.9903 | 0.9919 |

|                                                                               |         |         |         |         |        |         |
|-------------------------------------------------------------------------------|---------|---------|---------|---------|--------|---------|
| <b>B16F10<sup>CTL</sup>+PD-1 mAb vs B16F10<sup>CTL</sup>+IgG2a</b>            | 0.9996  | >0.9999 | 0.9924  | >0.9999 | 0.6295 | 0.1929  |
| <b>B16F10<sup>SPHK1-OE</sup>+PD-1 mAb vs B16F10<sup>SPHK1-OE</sup>+ IgG2a</b> | >0.9999 | 0.9993  | 0.6802  | 0.1843  | 0.0008 | <0.0001 |
| <b>B16F10<sup>SPHK1-OE</sup>+PD-1 mAb vs B16F10<sup>CTL</sup>+PD-1 mAb</b>    | 0.4904  | 0.8589  | 0.9964  | >0.9999 | 0.9998 | >0.9999 |
| <b>B16F10<sup>SPHK1-OE</sup>+ IgG2a vs B16F10<sup>CTL</sup>+IgG2a</b>         | 0.8157  | 0.9867  | 0.9316  | 0.3011  | 0.1716 | 0.0106  |
| <b>B16F10<sup>MTA3-OE</sup>+PD-1 mAb vs B16F10<sup>MTA3-OE</sup>+ IgG2a</b>   | 0.9984  | 0.9995  | 0.9338  | 0.3801  | 0.0134 | 0.0001  |
| <b>B16F10<sup>MTA3-OE</sup>+PD-1 mAb vs B16F10<sup>CTL</sup>+PD-1 mAb</b>     | 0.7571  | 0.9746  | >0.9999 | >0.9999 | 0.9990 | >0.9999 |
| <b>B16F10<sup>MTA3-OE</sup>+ IgG2a vs B16F10<sup>CTL</sup>+IgG2a</b>          | >0.9999 | 0.7315  | 0.9817  | 0.7063  | 0.7516 | 0.2053  |

**Supplementary Table 8, related to Fig.5** Summary of a mixed-effect model fitting. The tumor volume data were Log<sub>2</sub>-transformed before fitting. The SPHK1-OE+PD-1 mAb or MTA3-OE+PD-1 mAb was set as the reference group.

|                                      | Estimates | SEM   | <i>P</i> |                                      | Estimates | SEM   | <i>P</i> |
|--------------------------------------|-----------|-------|----------|--------------------------------------|-----------|-------|----------|
| <b>Days</b>                          | -0.116    | 0.571 | 0.008    | <b>Days</b>                          | 0.269     | 0.295 | 0.009    |
| <b>Body weight</b>                   | 0.858     | 0.105 | 0.421    | <b>Body weight</b>                   | 0.247     | 0.462 | 0.958    |
| <b>B16F10+IgG2a</b>                  | 0.033     | 0.707 | 0.963    | <b>B16F10+IgG2a</b>                  | 0.266     | 0.334 | 0.431    |
| <b>B16F10+PD-1 mAb</b>               | 1.041     | 0.855 | 0.231    | <b>B16F10+PD-1 mAb</b>               | -0.110    | 0.404 | 0.787    |
| <b>B16F10<sup>CTL</sup>+IgG2a</b>    | -0.358    | 0.866 | 0.682    | <b>B16F10<sup>CTL</sup>+IgG2a</b>    | -0.322    | 0.405 | 0.431    |
| <b>B16F10<sup>CTL</sup>+PD-1 mAb</b> | -0.577    | 1.47  | 0.697    | <b>B16F10<sup>CTL</sup>+PD-1 mAb</b> | -1.15     | 0.625 | 0.074    |
| <b>B16F10<sup>SPHK1OE</sup></b>      | -1.13     | 0.906 | 0.220    | <b>B16F10<sup>MTA3OE</sup></b>       | 0.078     | 0.406 | 0.849    |
| <b>+IgG2a</b>                        |           |       |          | <b>+IgG2a</b>                        |           |       |          |
| <b>Days: B16F10+IgG2a</b>            | -0.026    | 0.061 | 0.669    | <b>Days: B16F10+IgG2a</b>            | -0.110    | 0.029 | 0.034    |
| <b>Days: B16F10</b>                  | 0.099     | 0.080 | 0.221    | <b>Days: B16F10</b>                  | -0.004    | 0.038 | 0.909    |
| <b>+PD-1 mAb</b>                     |           |       |          | <b>+PD-1 mAb</b>                     |           |       |          |
| <b>Days:</b>                         | 0.041     | 0.083 | 0.621    | <b>Days:</b>                         | 0.016     | 0.039 | 0.686    |

| B16F10 <sup>CTL</sup> +IgG2a     |       |       |       | B16F10 <sup>CTL</sup> +IgG2a    |        |       |       |
|----------------------------------|-------|-------|-------|---------------------------------|--------|-------|-------|
| Days: B16F10 <sup>CTL</sup>      | 0.050 | 0.154 | 0.748 | Days: B16F10 <sup>CTL</sup>     | -0.021 | 0.021 | 0.031 |
| +PD-1 mAb                        |       |       |       | +PD-1 mAb                       |        |       |       |
| Days:                            | 0.114 | 0.782 | 0.153 | Days:                           | -0.001 | 0.037 | 0.984 |
| B16F10 <sup>SPHK10E</sup> +IgG2a |       |       |       | B16F10 <sup>MTA30E</sup> +IgG2a |        |       |       |

**Supplementary Table 9, related to Fig. 6** Clinicopathologic characteristics of PD-1 mAb therapy cohorts.

| No. | Age | Sex    | TNM Stage | Clinical Stage | Response | PS score | PFS (days)       | Metastatic site                                                           | Adverse effect             |
|-----|-----|--------|-----------|----------------|----------|----------|------------------|---------------------------------------------------------------------------|----------------------------|
| 1   | 66  | Female | T2aN1M0   | IIIA           | NR       | 1        | 93               | Inguinal lymph nodes                                                      | None                       |
| 2   | 53  | Female | T4aNxM1c  | IV             | NR       | 1        | 186              | Neck, axilla and inguinal lymph nodes, abdominal cavity, peritoneum, lung | None                       |
| 3   | 38  | Female | T3aN2bM0  | IIIB           | R        | 1        | 558 <sup>+</sup> | Axillary, subclavian, and elbow fossa lymph nodes                         | None                       |
| 4   | 75  | Female | T3bN3M0   | IIIC           | NR       | 1        | 62               | Axillary lymph nodes                                                      | None                       |
| 5   | 46  | Female | T2bN2cM0  | III            | NR       | 1        | 124              | Popliteal lymph nodes                                                     | None                       |
| 6   | 35  | Female | TxN2M1    | IV             | R        | 1        | 527              | Liver, bone, brain, inguinal lymph nodes                                  | None                       |
| 7   | 56  | Female | T4bN3cM1c | IV             | R        | 1        | 124 <sup>+</sup> | Inguinal and retroperitoneal lymph nodes                                  | Low cortisol               |
| 8   | 56  | Female | T1bN1aM0  | IIIA           | R        | 1        | 124 <sup>+</sup> | Inguinal lymph node                                                       | Low cortisol               |
| 9   | 70  | Female | T4bN2bM1a | IV             | NR       | 1        | 186              | Neck and inguinal lymph nodes                                             | None                       |
| 10  | 71  | Male   | T3bN3M1a  | IV             | NR       | 1        | 217              | Inguinal lymph nodes, left leg skin                                       | None                       |
| 11  | 46  | Male   | T4bN0M1   | IV             | NR       | 1        | 155              | Lung                                                                      | None                       |
| 12  | 37  | Female | T1aN1aM0  | IIIA           | R        | 1        | 124 <sup>+</sup> | Popliteal lymph node                                                      | White blood cell decreased |
| 13  | 58  | Female | T4bN1aM0  | IIIB           | R        | 1        | 124 <sup>+</sup> | Inguinal lymph node                                                       | None                       |
| 14  | 68  | Male   | T3bN1aM0  | IIIA           | R        | 1        | 124 <sup>+</sup> | Inguinal lymph node                                                       | Transient mania, psychosis |

|           |    |        |           |      |    |   |                  |                               |                                    |
|-----------|----|--------|-----------|------|----|---|------------------|-------------------------------|------------------------------------|
| <b>15</b> | 11 | Female | T4aN2bM0  | IIIB | R  | 1 | 124 <sup>+</sup> | Inguinal lymph nodes          | None                               |
| <b>16</b> | 68 | Female | T3bN2bM1c | IV   | R  | 1 | 93 <sup>+</sup>  | Inguinal lymph nodes,<br>lung | Nausea, vomiting                   |
| <b>17</b> | 64 | Female | TxN2M0    | IIIA | NR | 1 | 62               | Inguinal lymph nodes          | None                               |
| <b>18</b> | 64 | Female | T4bN1aM0  | IIIB | R  | 1 | 124 <sup>+</sup> | Inguinal lymph node           | Skin ulceration,<br>ACTH increased |
| <b>19</b> | 50 | Male   | T4bN0M0   | IIC  | R  | 1 | 124 <sup>+</sup> | None                          | None                               |

TNM stage based on the 8th Edition Melanoma Stage Classification. PS, Performance Status; PFS, progression-free survival; OS, overall survival. ACTH=adrenocorticotrophic hormone. All patients were treated with PD-1 monoclonal antibody after surgical resection of primary lesions, and those with recurrence or metastasis  $\leq 6$  months were considered as nonresponders (NR), while those without recurrence or metastasis longer than 6 months were considered as responders (R).

**Supplementary Table 10, related to Fig. 6** Association analyses between PD-L1 and SPHK1 or MTA3 expression levels in melanoma patients. For the expected values in cells that were less than 5, *P* values were computed using Fisher's exact tests. Statistical significance was considered with  $p < 0.05$ .

|                           |      | SPHK1 |     |                           | MTA3 |     |    |
|---------------------------|------|-------|-----|---------------------------|------|-----|----|
|                           |      | High  | Low | N                         | High | Low | N  |
| PD-L1                     | High | 9     | 1   | 10                        | 7    | 3   | 10 |
|                           | Low  | 1     | 8   | 9                         | 1    | 8   | 9  |
|                           | N    | 10    | 9   | 19                        | 8    | 11  | 19 |
| $p = 9.85 \times 10^{-4}$ |      |       |     | $p = 5.48 \times 10^{-3}$ |      |     |    |
